# Supplementary material
Source: PubMed Central journal article supplement (PMC7544951)
Supplement: TBSD_A_1815583_SM9087.pdf [file TBSD_A_1815583_SM9087.pdf]

# **Drug similarity and structure-based screening of medicinal compounds to target Macrodmain-I from SARS-CoV-2 to rescue the host immune system: A molecular dynamics study**

Zainib Babar<sup>1</sup>, Mazhar Khan<sup>2</sup>, Mubeen Zahra<sup>1</sup>, Munazza Anwer<sup>3</sup>, Kashif Noor<sup>4</sup>, Human Farooque Hashmi<sup>7</sup>, Muhammad Suleman<sup>5</sup>, Muhammad Waseem<sup>6</sup>, Abdullah Shah<sup>7</sup>, Shahid Ali<sup>5\*</sup>, Syed Shujait Ali<sup>5\*</sup>

<sup>1</sup>Department of Botany, University of Agriculture, Faisalabad, Punjab, Pakistan.

<sup>2</sup>The CAS Key Laboratory of Innate Immunity and Chronic Diseases, Hefei National Laboratory for Physical Sciences at Microscale, School of Life Sciences, CAS Center for Excellence in Molecular Cell Science, University of Science and Technology of China (USTC), Collaborative Innovation Center of Genetics and Development, Hefei 230027, Anhui, China.

<sup>1</sup>Department of Botany, University of Agriculture, Faisalabad, Punjab, Pakistan.

<sup>3</sup>Department of Biochemistry, Faculty of Biological Sciences, Quaid-i-Azam University, Islamabad, Pakistan.

<sup>4</sup>Center for Biotechnology and Microbiology, University of Swat, Swat, Khyber Pakhtunkhwa, Pakistan.

<sup>5</sup>Center for Biotechnology and Microbiology, University of Swat, Swat, Khyber Pakhtunkhwa, Pakistan.

<sup>6</sup>Faculty of Rehabilitation and Allied Health Science, Riphah International University, Islamabad, Pakistan.

<sup>7</sup>Department of Biotechnology, Shaheed Benazir Bhutto University, Sheringal, Dir, Pakistan.

<sup>7</sup>School of Life Sciences, Shandong University, Shandong, P.R China.

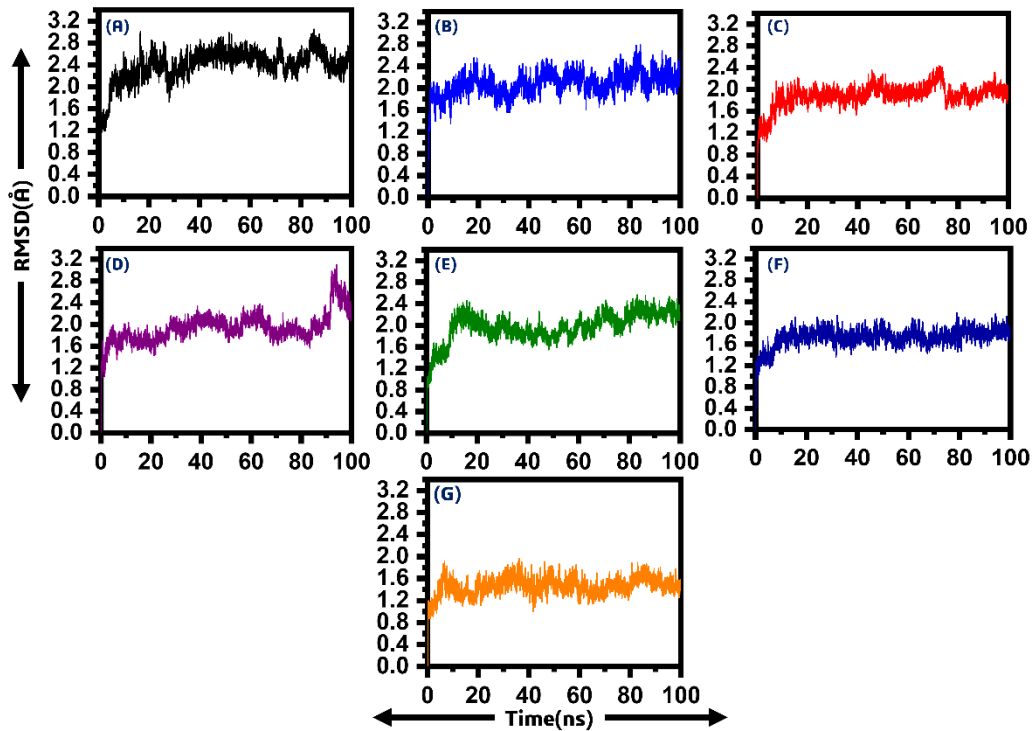

Supplementary Figure S1: RMSDs of all the complexes (replicate 2).

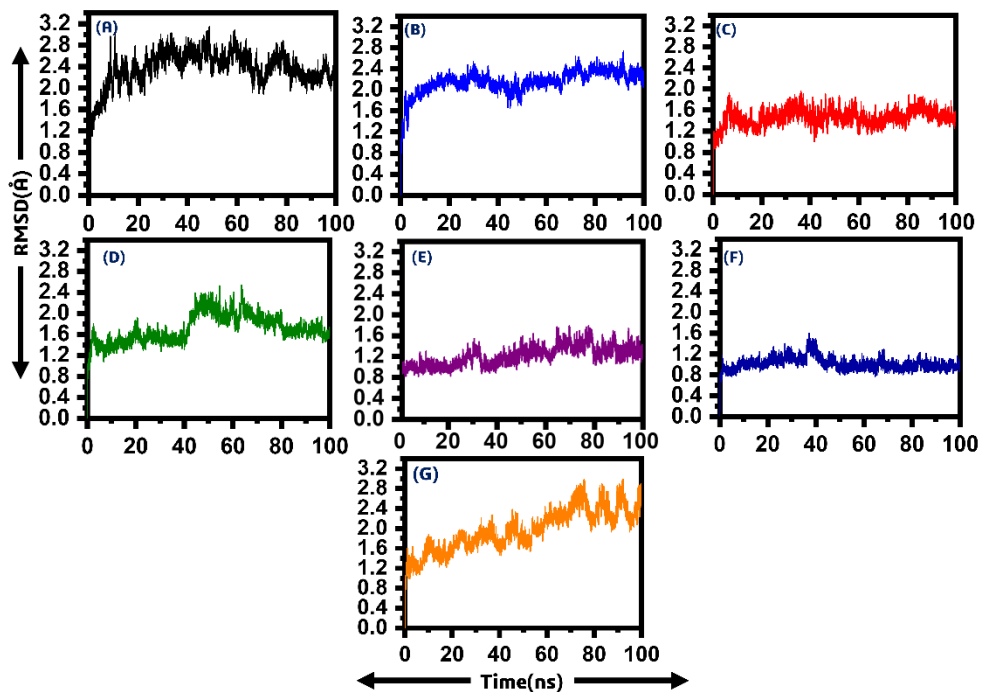

Supplementary Figure S2: RMSDs of all the complexes (replicate 3).

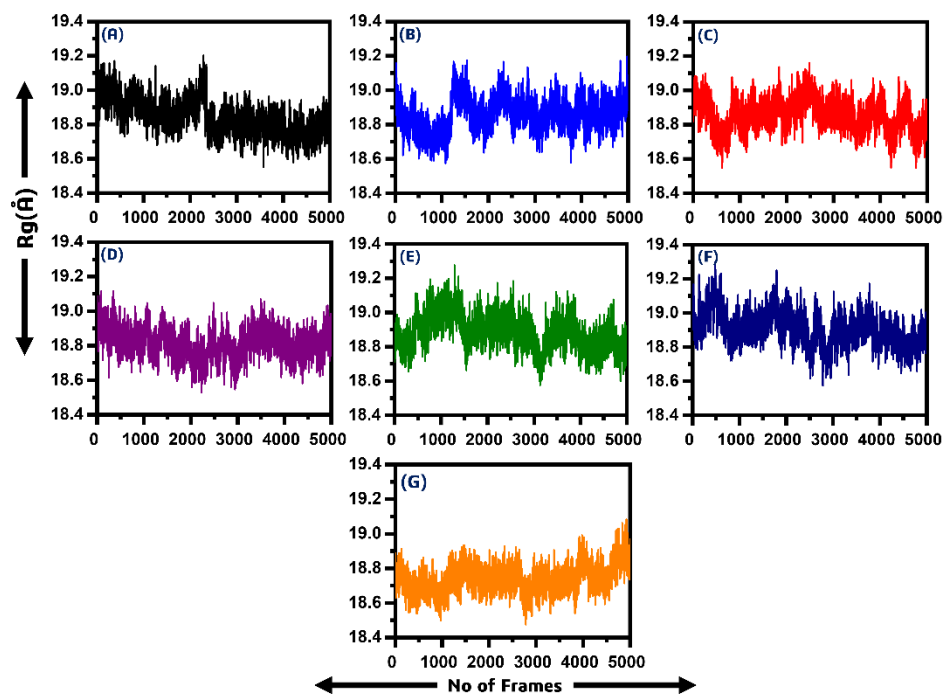

Supplementary Figure S3:  $R_g$  of all the complexes (replicate 2).

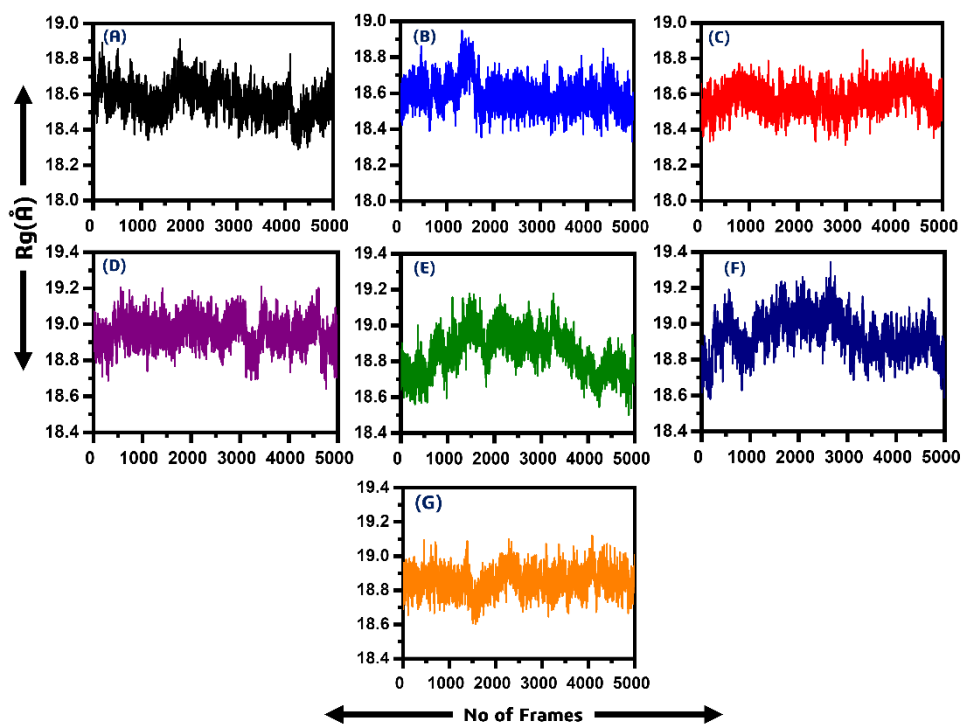

Supplementary Figure S4:  $R_g$  of all the complexes (replicate 3).

**Supplementary Table S1:** MMGBSA of all the complexes (replicate 2).

| Complexes                                                                              | MM-GBSA (kcal/mol) |                 |               |                 |                    |
|----------------------------------------------------------------------------------------|--------------------|-----------------|---------------|-----------------|--------------------|
|                                                                                        | $\Delta_{vdW}$     | $\Delta_{elec}$ | $\Delta_{ps}$ | $\Delta_{SASA}$ | $\Delta G_{Total}$ |
| <i>P1,P5-Di(guanosine-5') pentaphosphate ammonium salt</i><br>(ChemSpider ID: 4484327) | -85.142            | -11.247         | 34.462        | -5.111          | -69.326            |
| <i>(R)-RETRO-THIORPHAN</i><br>(ChemSpider ID: 394363)                                  | -78.716            | -22.569         | 32.669        | -4.100          | -67.877            |
| <i>P(1),P(6)-bis(5'-adenosyl)hexaphosphate</i><br>(ChemSpider ID: 110267)              | -66.324            | -23.426         | 30.185        | -5.212          | -68.587            |
| <i>(Rib5)ppA</i> (ChemSpider ID: 30975)                                                | -60.011            | -14.178         | 20.211        | -2.287          | -68.010            |
| <i>NA7</i> (ChemSpider ID: 393480)                                                     | -63.852            | -11.981         | 23.251        | -3.252          | -69.314            |
| <i>dephospho-CoA</i><br>(ChemSpider ID: 24785028)                                      | -67.259            | -17.548         | 18.874        | -4.276          | -63.258            |
| <i>ADPr</i>                                                                            | -64.147            | -17.326         | 19.253        | -5.158          | -65.923            |

**Supplementary Table S2:** MMGBSA of all the complexes (replicate 3).

| Complexes                                                                              | MM-GBSA (kcal/mol) |                 |               |                 |                    |
|----------------------------------------------------------------------------------------|--------------------|-----------------|---------------|-----------------|--------------------|
|                                                                                        | $\Delta_{vdW}$     | $\Delta_{elec}$ | $\Delta_{ps}$ | $\Delta_{SASA}$ | $\Delta G_{Total}$ |
| <i>P1,P5-Di(guanosine-5') pentaphosphate ammonium salt</i><br>(ChemSpider ID: 4484327) | -84.385            | -11.475         | 29.221        | -4.278          | -70.531            |
| <i>(R)-RETRO-THIORPHAN</i><br>(ChemSpider ID: 394363)                                  | -83.224            | -17.581         | 30.272        | -4.658          | -68.012            |
| <i>P(1),P(6)-bis(5'-adenosyl)hexaphosphate</i><br>(ChemSpider ID: 110267)              | -62.158            | -21.759         | 32.135        | -4.522          | -65.948            |
| <i>(Rib5)ppA</i> (ChemSpider ID: 30975)                                                | -63.240            | -13.586         | 23.586        | -2.485          | -68.003            |
| <i>NA7</i> (ChemSpider ID: 393480)                                                     | -63.369            | -14.485         | 23.254        | -3.758          | -70.699            |
| <i>dephospho-CoA</i><br>(ChemSpider ID: 24785028)                                      | -69.582            | -16.125         | 21.485        | -3.478          | -66.741            |
| <i>ADPr</i>                                                                            | -61.186            | -13.895         | 22.241        | -5.352          | -64.964            |
